# Supplementary material for: State-of-the-art review: allogeneic stem cell transplantation for myelofibrosis in 2019
Source: PubMed Central journal article supplement — Haematologica. 2019 Mar 14;104(4):659–68. doi: 10.3324/haematol.2018.206151 (PMC6442950; doi:10.3324/haematol.2018.206151), 2019-04
Supplement: 2018_206151-Disclosures_and_Contributions.pdf [file 2018_206151-Disclosures_and_Contributions.pdf]

Haematologica  
HAEMATOL/2018/206151  
Version 3

State-of-the-art review: allogeneic stem cell transplantation for  
myelofibrosis in 2019

Donal P. McLornan, Ibrahim Yakoub-Agha, Marie Robin, Yves  
Chalandon, Claire N. Harrison, and Nicolaus Kroger

Disclosures: Donal McLornan: Speaker Fees and Honoraria from Jazz Pharmaceuticals and Novartis There are no conflicts of interest between this work and any of the authors.

Contributions: DM, IYA, MR, YC, CH and NK were all involved in the structure, content and writing of this review article
