# Supplementary material for: State-of-the-art review: allogeneic stem cell transplantation for myelofibrosis in 2019
Source: PubMed Central journal article supplement — Haematologica. 2019 Mar 14;104(4):659–68. doi: 10.3324/haematol.2018.206151 (PMC6442950; doi:10.3324/haematol.2018.206151), 2019-04
Supplement: HAEMATOL-2018-206151v3-McLornan-01.pdf [file HAEMATOL-2018-206151v3-McLornan-01.pdf]

# Factors determining the outcomes after allogeneic stem cell transplantation in myelofibrosis

- Age
- Co-morbidities
- Splenectomy versus not ?
- Disease status: International Prognostic Scoring System (IPSS)/Dynamic IPSS
- Chronic phase versus blastic
- Mutational status
- Treatment
  - None
  - Cyto-reduction
  - JAK inhibitors
  - Experimental therapies
- ? Depth response

- Donor source
  - Sibling > Matched unrelated donor / Mismatched unrelated donor
  - Degree of HLA-match
  - Conditioning
    - Myeloablative conditioning
    - Reduced intensity conditioning
    - Sequential
  - T cell depletion versus non
  - Cytomegalovirus status: recipient/donor

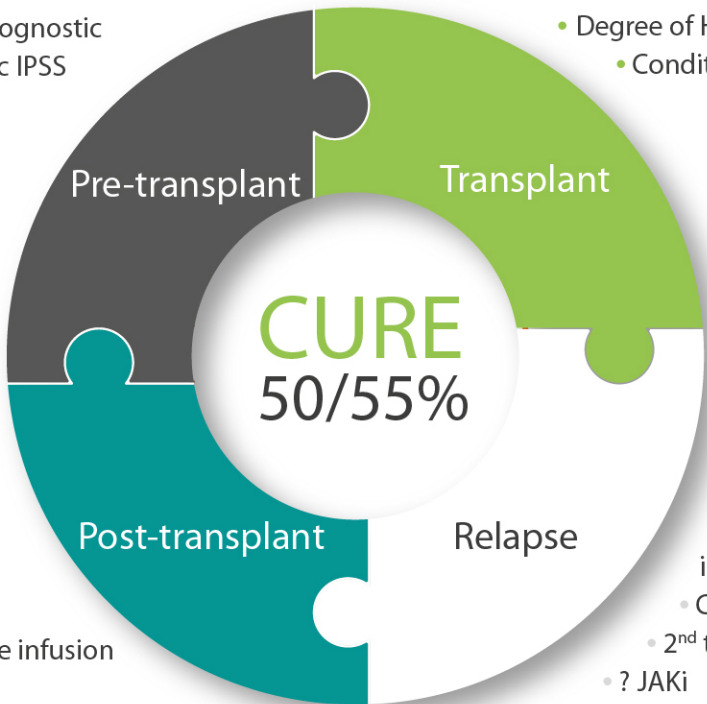

- Timing of immunosuppressive therapy wean
- Minimal residual disease/ Chimerism monitoring
- Pre-emptive donor lymphocyte infusion
- Maintenance JAK inhibitors ?
- Splenectomy ?
- Rate of fibrosis resolution
- Presence of poor graft function

- Therapeutic donor lymphocyte infusion (DLI)
- Chemotherapy +/- DLI
- 2<sup>nd</sup> transplant
- ? JAKi
- Role of checkpoint blockade ?
